# Supplementary material
Source: Research Square preprint supplement (doi:10.21203/rs.3.rs-9420902/v1)
Supplement: Supplementary file 1 [file 3f51c0384f336ef2554f5a8f.docx]

**Appendix C Comprehensive ECA Findings: Belonging in Health Professions Clinical Education**

| **Surrogate term** | **Related term** | **Attribute** | **Antecedents** | **Consequences** |
| --- | --- | --- | --- | --- |
| -Sense of **belonging**  -Belongingness  -Social **belongingness**  -Academic belongingness  -Professional belongingness  -Social **connectedness**  connectivity, connected, connect  connectedness, connection with others,  **-Team membership**  Part (one) of the team, the community, the culture, a group, the family; member of the team and working together,  -**Fitting in, fit** with dynamics  to a group, team, community | -**Community**  -Academic community, sense of community, community  -Sense of **integration** (into the team)  -**Integral** to the team, group  -I**ntegrated** into (not distanced from) the team  -**Included** in, feeling **included**  -**Inclusive** group (to be part of…)  -**Friendships**, new friendships; made friends with, group of friends, tight friendships  -**Bonded** (by shared interests)  -Good **camaraderie**/camaraderie  -**Collegiality**, sense of collegiality  -Social **affiliations, associations**  -Social **interaction**  -Social bonds, groups, circles | -**Attachment**  -**Accepted**, accepted as a member of/within a group (e.g., family, friends, team)  -**Acceptance** from others, sense of being accepted  **-Accepted into** an established group, e.g., treated as colleagues by members of the profession.  -Feel **accepted**  -Feeling **connected** to others  **-Community engagement**  -**Engagement**, interaction, **or interacting** with others in a meaningful way  -Perceived **fit** (i.e., feeling like you fit)  -**Team and group involvement**:  -Feel like **one of** the team, community.  -Made to feel you are **one of** the group.  -Feel **part of** the team, community  -Treated as **part of** the team  -Become an **essential part of** the group  -A sense of being an **important part of** the group, to **share** team **responsibilities, having a role** within the team  -Push oneself to **become part of** the community  -**Involved** in (the team)  -Closely **involved** in, to be involved  -A sense of **welcoming**, made to feel **welcome**, at home, part of the family, welcoming environment (community of practice), **welcomed**  Mutual **respect, respected** within the team  -**Establish**/form social **bonds, f**eel **close to**/with a group, feeling **connected** with or **integral** to the group  -Become **familiar** or **comfortable** **with** the environment, feel **comfortable** with the **group vibe**  -Being **in harmony with** members of a group, having **continuity** with others (i.e. patients, teams, etc.), bring people **together/cohesive** (working toward goals), **values** are **in** **harmony** **with** those in the group  **Get to know/knowing others** well (sense of familiarity)  -**get to know, feel at ease** with others, form close relationships, develop strong bonds, tight/strong friendships with others/between those in the group, closeness  -Making/made **friends,** being **in touch with** others, forming **close relationships** with people you work with; developing **strong bonds**, **friendships** with others/between those in the group, within institution  -Develop **relationships**/stronger interpersonal with others, develop trusting **relationships**, r**elationships** determine whether someone feels they fit in and are accepted on the team/in the group.  -I**nterpersonal dynamics, group dynamics, cohesion,**  -Being **socialized** (into the group/group activities) – socialization, s**ettle in** (to a place, environment)  -I**nteractions** with others where there is **reciprocal** **interest** in **and** **care** about each other.  -**Shared** interests/activities (e.g., bonded by interests); s**haring** similar characteristics with others (e.g., being in the group for those who are struggling); form social bonds/friendships through **shared experiences** (e.g., shared accommodation, social events, interests, activities, living, working, stress etc.); **cooperative** and **collaborative** environment held together by **shared** interests and commitments, **foster** an atmosphere of **collegiality**  -Feeling **empathy** with others ‘in the same boat’  -Feel **supported**, mutual support, forming an informal support mechanism, a supportive community, group, environment.  -**Feel protected by** members of **a**n established **group**, e.g., ‘taken under the wing’ of senior clinicians.  -Being with others who are friendly, warm, supportive, helpful - a **supportive** **environment**.  - sense of **safety/security** (being with others who are friendly, warm, supportive, helpful)  -Feel **safe, secure**.  -Feeling/being helped and **supported**, being supportive to each other in the group  - Mutual **support**  -to be **fully involved** in team activities, patient care, closely **involved** in, to be involved.  -Belonginess fostered through being **included**  **-**Feel **included, f**eel **engaged** (in group activities)  -Feeling known, **recognized**, **appreciated**, listened to, **validated, encouraged, acknowledged,** feel **understood** (common language, culture), **valued,** feeling **legitimized**/having a legitimate role in the group, **valued** and **respected** (as part of/by the group_  -**Trusted** and given **responsibility,** feeling/being **trusted,** being **invested** in.  -Having **clarity around** **responsibilities and ground rules**  -**Conforming** to/adopting group norms and values (increased likelihood of conforming/adopting norms and values to improve chances of being accepted, even if uncomfortable doing so)  -**Aligning** with existing norms and practices the program/group)  **-Adapting** one’s perspective **to fit in** with the group.  -**Compliance**  - | **Clinical Environment**  **Interpersonal relationships**  **(clinical educators, mentorship, peers)**  **Affective qualities** | **Professional identity formation**  **Organizational Alignment**  **Educational Impact**  **Affective qualities** |
