# Supplementary material
Source: Research Square preprint supplement (doi:10.21203/rs.3.rs-9420902/v1)
Supplement: Supplementary file 2 [file 5b04878433e7ee7c9e179e0c.docx]

**Table 2. Example of Data Extraction**

| **Reference** | **Profession** | **Surrogate Terms**  **(Synonyms)** | **Related Concepts** | **Antecedents** | **Consequences** | **Attributes** | **Other Contextual Factors** |
| --- | --- | --- | --- | --- | --- | --- | --- |
| Sedgwick, M., Oosterbroek, T., & Ponomar, V. (2014). "It all depends": How minority nursing students experience belonging during clinical experiences. Nursing Education Perspectives, 35(2), 89–93. https://doi.org/10.5480/11-707.1 | Nursing | Feeling connected  Group membership | Professional socialization; inclusion | Positive: friendliness of nurses; connectedness to other students; instructors treating students fairly; peer dependability; authentic appreciation and valuation; support from RN’s and peers  Negative: lack of welcome; unfair treatment | Positive:  Improved learning, feeling like a nurse  Negative: leaving profession; anger, frustration, decrease self-confidence, feeling invisible, experience discrimination, bias; feeling like outsider | Universal human need; unique and deeply personal. Opposite: lack of social bonds; alienation; isolation; feeling disliked; feeling invisible; | Minoritized students felt invisible entering clinical setting; bias and discrimination |
| Brandford, E., Wang, T., Nguyen, C., & Rassbach, C. E. (2022). Sense of belonging and professional identity among combined pediatrics-anesthesiology residents. Academic Pediatrics, 22(7), 1246–1253. | Medicine  (Pediatrics-Anesthesiology Residents) | Sense of belonging  Fitting in  Group/team membership | Strong bonds; community; social integration. | Positive: strong intern bonds; team-based structures; recognition by attendings/staff; longitudinal training; autonomy and ownership of patient care as learner  Negative: divergent training timelines; frequent transitions; social isolation | Increased motivation and achievement, greater likelihood to pursue career in relevant field  Negative: Decreased clinical engagement, social isolation, uncertainty about specialty identity | Find one's fit; feel part of the group; not out of place; sense of community; closeness with peers. Opposite: isolation; outsider; distance |  |
| Radford, D., & Hellyer, P. (2016). Belongingness in undergraduate dental education. British Dental Journal, 220, 539–543. https://doi.org/10.1038/sj.bdj.2016.379 | Dentistry | Sense of connectedness  Fitting in | Teamwork; together; part of the group; integrated into the team; accepted; | Positive: shared living; nurturing environment; student-focused staff; staff learning student names before rotation; team-based interprofessional care; genuine formal and informal interest in students; clear ground rules  Negative: impersonal environments | Positive: Students develop autonomy and self-actualization; realistically prepared for future careers; integrated into the team; feeling welcomed and accepted as group member; feeling at home, part of family; comfortable in environment; feeling essential and valued |  |  |
| Qureshi, A., Fino, E., Vivekananda-Schmidt, P., Sandars, J., & Halti Cabral, R. (2019). Validating an adapted questionnaire to measure belongingness of medical students in clinical settings. Cogent Medicine, 6(1). https://doi.org/10.1080/2331205X.2019.1620087 | Medicine | Belonging  Group membership  Connectedness | Part of the group; attachment; connectedness | Positive: connectedness; being part of a group; integration into clinical placements; high self-esteem; sense of being in touch with others | Positive: students more empowered; proactive; self-confident; motivation for learning; identity development; wellbeing; esteem | Feel safe, comfortable, satisfied, happy; a sense of support from others; feelings of connectedness encompassing social presence, attachment, and interpersonal relationships |  |
| Levett-Jones, T., Lathlean, J., McMillan, M., & Higgins, I. (2007). Belongingness: A montage of nursing students' stories of their clinical placement experiences. Contemporary Nurse, 24(2), 162–174. https://doi.org/10.5172/conu.2007.24.2.162 | Nursing | Belongingness  Fitting in  Connected  Team membership | Inclusion; connected; integral; part of the team; acceptance. Opposite: alienation; rejected. | Positive: inclusion; connectedness; acceptance; feeling cared for, valued, respected; positive interpersonal relationships; quality mentorship; aligned values; welcoming clinical leaders; access to resources  Negative: exclusion; lack of mentorship; misaligned values | Productive clinical experience; felt cared for; influences career decisions; motivation for learning; enhanced connectedness and esteem; well-being; increased confidence and challenged thinking; engage in self-directed learning; proactive, autonomous  Negative: alienation; dissonance; distress; detachment; disengagement; dissatisfaction; disempowered | Secure, accepted, included, valued and respected by group; connected and integral to group; personal/professional values in harmony with group; legitimate place in team | Workforce pressures; staff shortages; skill-mix; patient acuity; presence/absence guidelines; ward culture |
| Grobecker, P. A. (2016). A sense of belonging and perceived stress among baccalaureate nursing students in clinical placements. Nurse Education Today, 36, 178–183. https://doi.org/10.1016/j.nedt.2015.09.015 | Nursing | Social connectedness  Fitting in | Fitting in; social attachments; social connectedness; acceptance | Positive: feeling needed and accepted; increased time with RNs; learning needs met; manageable stress  Negative: rejection; exclusion; feeling unprepared; stress | Positive: team contribution; improved connectedness and self-esteem; reduced stress/anxiety; self-confidence  Negative: loneliness; rejection; stress; depression; delayed motivation | Sense of fitting in and belonging to a group; acceptance; social bonds; feeling needed |  |
