# Supplementary material
Source: Research Square preprint supplement (doi:10.21203/rs.3.rs-9420902/v1)
Supplement: Supplementary file 3 [file 77b8aa5489d853f87b55f280.docx]

**Appendix: Database Search Strings**

| **Database** | **Search String** |
| --- | --- |
| **PubMed** | (((belongingness[tiab] OR "sense of belonging"[tiab]) AND (research design OR concept analysis) AND education) OR ((belongingness[tiab] OR "sense of belonging"[tiab]) AND (psychology, educational OR psychology, social)) OR ((belongingness[tiab] OR "sense of belonging"[tiab]) AND (social environment OR social identification OR social conformity OR social distance)) OR ((belongingness[tiab] OR "sense of belonging"[tiab]) AND concept analysis)) AND (("health occupations"[mesh] OR "health professions" OR "allied health" OR medicine OR nursing OR dentistry OR pharmacy OR "clinical clerkship"[mesh] OR "clinical clerkship") AND (education OR ("education, professional"[mesh] AND clinical))) |
| **EMBASE** | ((belongingness:ab,ti OR 'sense of belonging':ab,ti) AND ('research design'/exp OR 'research design' OR (('research'/exp OR research) AND ('design'/exp OR design)) OR 'concept analysis'/exp OR 'concept analysis' OR (('concept'/exp OR concept) AND ('analysis'/exp OR analysis))) AND ('education'/exp OR education) OR ((belongingness:ab,ti OR 'sense of belonging':ab,ti) AND ('educational psychology'/exp OR 'educational psychology' OR (educational AND ('psychology'/exp OR psychology)) OR 'social psychology'/exp OR 'social psychology' OR (('social'/exp OR social) AND ('psychology'/exp OR psychology)))) OR ((belongingness:ab,ti OR 'sense of belonging':ab,ti) AND ('social environment'/exp OR 'social environment' OR (('social'/exp OR social) AND ('environment'/exp OR environment)) OR 'social identification'/exp OR 'social identification' OR (('social'/exp OR social) AND ('identification'/exp OR identification)) OR 'social conformity'/exp OR 'social conformity' OR (('social'/exp OR social) AND ('conformity'/exp OR conformity)) OR 'social distance'/exp OR 'social distance' OR (('social'/exp OR social) AND ('distance'/exp OR distance)))) OR ((belongingness:ab,ti OR 'sense of belonging':ab,ti) AND ('concept analysis'/exp OR 'concept analysis' OR (('concept'/exp OR concept) AND ('analysis'/exp OR analysis))))) AND ('health occupations'/exp OR 'health occupations' OR 'health professions'/exp OR 'health professions' OR 'professional education'/exp OR 'professional education' OR 'allied health' OR 'medicine'/exp OR medicine OR 'nursing'/exp OR nursing OR 'dentistry'/exp OR dentistry OR 'pharmacy'/exp OR pharmacy OR 'clinical clerkship'/exp OR 'clinical clerkship') AND ('education'/exp OR education OR 'professional education'/exp OR 'professional education' OR (professional AND ('education'/exp OR education))) AND [embase]/lim NOT ([embase]/lim AND [medline]/lim) AND ([article]/lim OR [article in press]/lim OR [preprint]/lim) AND [english]/lim AND [01-12-2021]/sd NOT [26-09-2023]/sd |
| **ERIC, PsycINFO, & Web of Science** | (abstract(belonging OR "sense of belonging") AND ((research design OR concept analysis) AND education)) OR (abstract(belonging OR "sense of belonging") AND (educational psychology OR social psychology)) OR (abstract(belonging OR "sense of belonging") AND (social environment OR social identification OR social conformity OR social distance)) OR (abstract(belonging OR "sense of belonging") AND concept analysis) AND ("health occupations" OR "health professions" OR "allied health" OR medicine OR nursing OR dentistry OR "clinical clerkship") AND (education OR professional education) AND clinical) |
